# Supplementary material
Source: PubMed Central journal article supplement (PMC3224254)
Supplement: supp_kwr273_kwr273_Web_Appendix.pdf [file supp_kwr273_kwr273_Web_Appendix.pdf]

**Web Appendix. Unadjusted difference-in-difference estimates for outcomes in all four sections of Philadelphia, Pennsylvania, USA from 1999-2008**

|                                                     | Point-based estimates |                     |                    | Tract-based estimates |                     |                    | Block group-based estimates |                     |                    |
|-----------------------------------------------------|-----------------------|---------------------|--------------------|-----------------------|---------------------|--------------------|-----------------------------|---------------------|--------------------|
|                                                     | Pre-period<br>Mean    | Post-period<br>Mean | Mean<br>Difference | Pre-period<br>Mean    | Post-period<br>Mean | Mean<br>Difference | Pre-period<br>Mean          | Post-period<br>Mean | Mean<br>Difference |
| Assaults (per sq mi, number)                        |                       |                     |                    |                       |                     |                    |                             |                     |                    |
| Greened vacant lots                                 | 273.06                | 230.61              | -42.45             | 55.60                 | 46.38               | -9.21              | 9.06                        | 7.12                | -1.94              |
| Control vacant lots                                 | 243.46                | 222.17              | -21.28             | 50.73                 | 47.09               | -3.63              | 8.31                        | 7.50                | -0.81              |
| Difference-in-difference                            |                       | **                  | -21.16             |                       | **                  | -5.58              |                             | **                  | -1.12              |
| Gun Assaults (per sq mi, number)                    |                       |                     |                    |                       |                     |                    |                             |                     |                    |
| Greened vacant lots                                 | 108.85                | 81.06               | -27.79             | 22.15                 | 16.23               | -5.92              | 3.68                        | 2.52                | -1.16              |
| Control vacant lots                                 | 93.90                 | 78.22               | -15.68             | 19.44                 | 16.38               | -3.06              | 3.23                        | 2.61                | -0.61              |
| Difference-in-difference                            |                       | **                  | -12.11             |                       | **                  | -2.86              |                             | **                  | -0.55              |
| Robberies (per sq mi, number)                       |                       |                     |                    |                       |                     |                    |                             |                     |                    |
| Greened vacant lots                                 | 186.74                | 166.13              | -20.61             | 39.44                 | 34.44               | -5.00              | 6.04                        | 5.35                | -0.70              |
| Control vacant lots                                 | 195.06                | 185.91              | -9.15              | 40.71                 | 39.48               | -1.22              | 6.66                        | 6.35                | -0.31              |
| Difference-in-difference                            |                       | **                  | -11.46             |                       | **                  | -3.78              |                             | **                  | -0.39              |
| Gun Robberies (per sq mi, number)                   |                       |                     |                    |                       |                     |                    |                             |                     |                    |
| Greened vacant lots                                 | 95.23                 | 82.41               | -12.82             | 20.17                 | 16.95               | -3.22              | 3.12                        | 2.68                | -0.44              |
| Control vacant lots                                 | 96.36                 | 90.36               | -6.00              | 20.23                 | 19.19               | -1.05              | 3.30                        | 3.09                | -0.20              |
| Difference-in-difference                            |                       | **                  | -6.82              |                       | **                  | -2.18              |                             | **                  | -0.24              |
| Narcotics Sales and Possession (per sq mi, number)  |                       |                     |                    |                       |                     |                    |                             |                     |                    |
| Greened vacant lots                                 | 400.10                | 431.19              | 31.09              | 79.79                 | 81.69               | 1.90               | 13.60                       | 11.97               | -1.63              |
| Control vacant lots                                 | 386.77                | 447.60              | 60.83              | 80.97                 | 94.46               | 13.49              | 13.47                       | 15.10               | 1.63               |
| Difference-in-difference                            |                       | **                  | -29.74             |                       | **                  | -11.59             |                             | **                  | -3.27              |
| Burglaries (per sq mi, number)                      |                       |                     |                    |                       |                     |                    |                             |                     |                    |
| Greened vacant lots                                 | 190.84                | 188.30              | -2.54              | 39.80                 | 38.63               | -1.17              | 6.36                        | 6.36                | 0.01               |
| Control vacant lots                                 | 188.41                | 194.42              | 6.01               | 40.03                 | 41.41               | 1.38               | 6.62                        | 6.82                | 0.19               |
| Difference-in-difference                            |                       | **                  | -8.55              |                       | **                  | -2.55              |                             | *                   | -0.18              |
| Thefts (per sq mi, number)                          |                       |                     |                    |                       |                     |                    |                             |                     |                    |
| Greened vacant lots                                 | 491.20                | 427.99              | -63.21             | 106.36                | 90.22               | -16.14             | 16.19                       | 13.58               | -2.61              |
| Control vacant lots                                 | 544.87                | 496.54              | -48.34             | 114.63                | 104.47              | -10.16             | 19.44                       | 17.66               | -1.77              |
| Difference-in-difference                            |                       | **                  | -14.87             |                       | **                  | -5.98              |                             | **                  | -0.83              |
| Vandalism and Criminal Mischief (per sq mi, number) |                       |                     |                    |                       |                     |                    |                             |                     |                    |
| Greened vacant lots                                 | 334.08                | 325.34              | -8.74              | 71.16                 | 66.62               | -4.55              | 11.33                       | 10.43               | -0.90              |
| Control vacant lots                                 | 345.13                | 356.33              | 11.21              | 73.40                 | 75.76               | 2.36               | 12.13                       | 12.45               | 0.32               |
| Difference-in-difference                            |                       | **                  | -19.95             |                       | **                  | -6.91              |                             | **                  | -1.21              |
| Disorderly Conduct (per sq mi, number)              |                       |                     |                    |                       |                     |                    |                             |                     |                    |
| Greened vacant lots                                 | 71.54                 | 74.73               | 3.19               | 16.48                 | 16.25               | -0.23              | 2.36                        | 2.32                | -0.04              |
| Control vacant lots                                 | 88.27                 | 81.34               | -6.93              | 18.85                 | 17.28               | -1.57              | 3.11                        | 2.84                | -0.27              |
| Difference-in-difference                            |                       | **                  | 10.12              |                       | **                  | 1.34               |                             | **                  | 0.23               |
| Public Drunkenness (per sq mi, number)              |                       |                     |                    |                       |                     |                    |                             |                     |                    |
| Greened vacant lots                                 | 3.30                  | 3.01                | -0.30              | 0.74                  | 0.61                | -0.13              | 0.10                        | 0.08                | -0.02              |
| Control vacant lots                                 | 3.78                  | 3.45                | -0.34              | 0.76                  | 0.74                | -0.02              | 0.14                        | 0.13                | -0.01              |
| Difference-in-difference                            |                       |                     | 0.04               |                       | **                  | -0.11              |                             |                     | -0.01              |
| Illegal Dumping (per sq mi, number)                 |                       |                     |                    |                       |                     |                    |                             |                     |                    |
| Greened vacant lots                                 | 14.36                 | 13.30               | -1.05              | 2.81                  | 2.68                | -0.13              | 0.48                        | 0.45                | -0.03              |
| Control vacant lots                                 | 13.72                 | 13.43               | -0.29              | 2.73                  | 2.64                | -0.09              | 0.47                        | 0.46                | -0.01              |
| Difference-in-difference                            |                       | **                  | -0.77              |                       |                     | -0.04              |                             |                     | -0.02              |
| High Stress (%)                                     |                       |                     |                    |                       |                     |                    |                             |                     |                    |
| Greened vacant lots                                 | 31.53                 | 35.68               | 4.15               | 31.43                 | 35.79               | 4.36               | Not available               |                     |                    |
| Control vacant lots                                 | 31.29                 | 35.28               | 3.99               | 31.32                 | 35.38               | 4.05               |                             |                     |                    |
| Difference-in-difference                            |                       | *                   | 0.16               |                       | **                  | 0.31               |                             |                     |                    |
| High Cholesterol (%)                                |                       |                     |                    |                       |                     |                    |                             |                     |                    |
| Greened vacant lots                                 | 32.03                 | 36.04               | 4.01               | 26.02                 | 26.12               | 0.10               | Not available               |                     |                    |
| Control vacant lots                                 | 31.52                 | 35.12               | 3.60               | 26.72                 | 25.96               | -0.77              |                             |                     |                    |
| Difference-in-difference                            |                       | **                  | 0.41               |                       | **                  | 0.86               |                             |                     |                    |
| High Blood Pressure (%)                             |                       |                     |                    |                       |                     |                    |                             |                     |                    |
| Greened vacant lots                                 | 34.68                 | 36.09               | 1.41               | 34.82                 | 36.19               | 1.37               | Not available               |                     |                    |
| Control vacant lots                                 | 34.02                 | 35.18               | 1.16               | 34.41                 | 35.44               | 1.04               |                             |                     |                    |
| Difference-in-difference                            |                       | *                   | 0.25               |                       | *                   | 0.33               |                             |                     |                    |
| Exercise less than Two Days a Week (%)              |                       |                     |                    |                       |                     |                    |                             |                     |                    |
| Greened vacant lots                                 | 53.70                 | 47.60               | -6.10              | 54.38                 | 47.87               | -6.51              | Not available               |                     |                    |
| Control vacant lots                                 | 53.13                 | 46.76               | -6.37              | 53.67                 | 47.10               | -6.58              |                             |                     |                    |
| Difference-in-difference                            |                       | **                  | 0.26               |                       |                     | 0.07               |                             |                     |                    |
| Poor Health Status (%)                              |                       |                     |                    |                       |                     |                    |                             |                     |                    |
| Greened vacant lots                                 | 31.52                 | 33.33               | 1.81               | 32.62                 | 34.06               | 1.44               | Not available               |                     |                    |
| Control vacant lots                                 | 29.95                 | 31.72               | 1.78               | 30.81                 | 32.60               | 1.79               |                             |                     |                    |
| Difference-in-difference                            |                       |                     | 0.03               |                       | *                   | -0.35              |                             |                     |                    |
| Property Taxes (millions \$)                        |                       |                     |                    |                       |                     |                    |                             |                     |                    |
| Greened vacant lots                                 | 825.97                | 865.65              | 39.69              | 874.58                | 867.09              | -7.50              | 879.07                      | 859.79              | -19.28             |
| Control vacant lots                                 | 850.90                | 900.19              | 49.29              | 915.61                | 915.25              | -0.36              | 904.71                      | 891.46              | -13.26             |
| Difference-in-difference                            |                       | **                  | -9.60              |                       | *                   | -7.14              |                             |                     | -6.02              |

\* p<0.01, \*\* p<0.001
